Article

# Underlying influence of perception of management leadership on patient safety climate in healthcare organizations – A mediation analysis approach

SHAO-JEN WENG<sup>1</sup>, SEUNG-HWAN KIM<sup>2</sup>, and CHIEH-LIANG WU<sup>3</sup>

<sup>1</sup>Department of Industrial Engineering & Enterprise Information, Tunghai University, Taichung City 40704, Taiwan,

<sup>2</sup>Department of Business Administration, Ajou University, Suwon 443-749, South Korea, and <sup>3</sup>Center for Quality Management, Taichung Veterans General Hospital, Taichung City 40705, Taiwan

Address reprint requests to: Seung-Hwan Kim, Department of Business Administration, Ajou University, Suwon 443-749, South Korea. Tel: +82-31-219-3631; Fax: +82-31-219-1616; E-mail: seunk@ajou.ac.kr

Editorial Decision 7 November 2016; Accepted 17 November 2016

## Abstract

**Objective:** We aim to draw insights on how medical staff's perception of management leadership affects safety climate with key safety related dimensions—teamwork climate, job satisfaction and working conditions.

**Design/Setting:** A cross-sectional survey using Safety Attitude Questionnaire (SAQ) was performed in a medical center in Taichung City, Taiwan. The relationships among the dimensions in SAQ were then analyzed by structural equation modeling with a mediation analysis.

**Participants:** 2205 physicians and nurses of the medical center participated in the survey. Because not all questions in the survey are suitable for entire hospital staff, only the valid responses ( $n = 1596$ , response rate of 72%) were extracted for analysis.

**Main Outcome Measure(s):** Key measures are the direct and indirect effects of teamwork climate, job satisfaction, perception of management leadership, and working conditions on safety climate.

**Results:** Outcomes show that effect of perception of management leadership on safety climate is significant (standardized indirect effect of 0.892 with  $P$ -value 0.002) and fully mediated by other dimensions, where 66.9% is mediated through teamwork climate, 24.1% through working conditions and 9.0% through job satisfaction.

**Conclusions:** Our findings point to the importance of management leadership and the mechanism of its influence on safety climate. To improve safety climate, the implication is that commitment by management on leading safety improvement needs to be demonstrated when it implements daily supportive actions for other safety dimensions. For future improvement, development of a management system that can facilitate two-way trust between management and staff over the long term is recommended.

**Key words:** patient safety, management leadership, quality improvement, mediation effect

## Introduction

In healthcare organizations, errors, failures and accidents in their processes can be extremely costly for both them and their patients [1, 2]. Improving patient safety has become a critical issue in the healthcare industry [3–8] and it is no coincidence that Patient Safety Culture (PSC) has received strong attention from healthcare organizations, including international organizations like the Institute of Medicine and The Joint Commission, and recently they have been pressuring hospitals to address patient safety issues through PSC surveys and appropriate quality interventions [3, 9].

One of the main theoretical sources healthcare organizations have been relying on for PSC research is High Reliability Theory (HRT), which was developed at the University of California Berkeley. It is based on a study of how High Reliability Organizations (HROs) manage to maintain such high reliability in their operations [10]. HROs are a type of organizations that require near error-free operations. Such organizations include those in the nuclear power industry and aviation industry. The main idea of HRT is that errors can be prevented through ‘management leadership’ and it emphasizes the trust of employees in the leadership and the quality of relationships between leaders and employees [11]. Another important element of the HRT is that HROs promote ‘safety culture’, which was first employed by the International Nuclear Safety Advisory Group after the Chernobyl disaster in 1986 [12]. Safety culture was defined by the IAEA (International Atomic Energy Agency) as “...the assembly of characteristics and attitudes in organizations and individuals which establish that, as an overriding priority, safety issues receive the attention warranted by their significance” [12]. A number of studies suggest the role of management leadership is critical for achieving high levels of safety within organizations [13–20]. Also it has been reported that organizations with strong safety cultures strive to make it their number one priority [21].

One of the instruments that have played an influential role in PSC research is the self-administered Safety Attitude Questionnaire (SAQ) which was developed by the University of Texas [22] and has been validated and widely used in the healthcare industry [23, 24]. The survey uses six safety dimensions—safety climate, perception of management, teamwork climate, job satisfaction, working conditions, and stress recognition [22]. Safety climate assesses the strength of the perception of a strong and proactive organizational commitment to safety. Perception of management is based on the degree to which staffs approve of managerial actions. Teamwork climate is defined as the perceived quality of collaboration among personnel. Job satisfaction is the degree to which people feel positively about their work experience. Working conditions are based on the perceived quality of the work environment and logistical support, such as staffing and equipment. Finally, stress recognition measures how performance is influenced by stressors.

In this research, we leverage two key elements of HRT, ‘management leadership’ and ‘safety culture’, to draw insights on how the influence of medical staff’s perception of management leadership affects PSC of healthcare organizations by employing a SAQ-based instrument with a mediation analysis. Even though the impact of management leadership on safety culture has been well studied in the discipline of human resource management [13, 15–20, 25], this is not the case in PSC research where most works just analyze factors that affect PSC without putting the focus on the impact of management leadership, or just recognize the importance of management leadership on PSC without investigating the mechanisms behind it [26–28].

## Methods

### Hospital setting

This study was conducted at Taichung Veterans General Hospital in Taichung City, Taiwan. It began offering medical services on 16 September 1982. Since 1991 it has been accredited as a ‘Medical Center and First-Class Teaching Hospital’ by the Department of Health, Taiwan. Taichung Veterans General Hospital is a 1500-bed hospital with around 3000 employees. It is able to take care of 6000 outpatients, 130 inpatients and 180 patients in the emergency room daily.

### Data collection

The hospital management implements a SAQ-based survey every year. Physicians, nurses and other employees in the hospital are required to do the survey in the e-learning system of the hospital. In hospitals, the core staff generally consists of physicians and registered nurses [29], with nurses being the biggest workforce in healthcare organizations, which possess enough power to move the underlying organizational culture toward a greater PSC [30]. Also not all questions in the survey were suitable for all staff members and therefore we only considered the responses from physicians and nurses. The responses were received in October 2013 and 1596 out of 2205 responses were valid, which represents a 72% response rate. The demographic information of the respondents in the data set is summarized in Table 1. The participants rated each question based on a five-point Likert scale ranging from strongly agree to strongly disagree, or a frequency such as never, rarely, sometimes, most of the time and always [22]. Ethical approval for this study was obtained from the Institutional Review Board of Taichung Veterans General Hospital in Taiwan (IRB TCVGH No: CW15250A).

Both physicians and nurses used 30 items to evaluate PSC. In addition, Items 2 and 11 were reversed questions such that each respondent’s answer was adjusted. For instance, the original answer of strongly agree in Item 2 (In this clinical area, it is difficult to speak up if I perceive a problem with patient care) indicates poor performance of patient safety. The adjustment is thus to use a numerical value of one if the original answer is strongly agree instead of the numerical value of five. By the same token, the answer from Item 11 is also adjusted.

### Measures

The key constructs in our research are management leadership and safety culture. To measure management leadership, we selected questions from the ‘hospital management support’ scale developed by a new Chinese version of SAQ [31] and the dimension of ‘perception of management’ in the original SAQ. These items were entitled as ‘perception of management leadership’ dimension. This dimension measures the perception of medical staff on how well the managers or leaders lead and support the medical staff in terms of commitment to safety [32–36]. Then to measure the construct of safety culture, items in ‘safety climate’ dimension of SAQ were used in this study. Guldenmund [37] states the ‘culture’ of an organization expresses itself through its organizational ‘climate’ and therefore measuring climate is commonly used in surveys for measuring organizational culture. Safety climate is considered an effective variable for measuring an organization’s safety culture because of its ease and effectiveness [25, 38, 39].

The other safety dimensions of SAQ were measured by the original questions of SAQ, with the ‘stress recognition’ dimension excluded from the study. Taylor and Pandian [40] investigated the works of Speroff *et al.* [41] and Taylor *et al.* [42] to demonstrate that stress recognition does not fit into the overall safety climate

construct and consequently recommended stress recognition be removed in SAQ. Also Sexton *et al.* [22] and Lee *et al.* [29] reported that stress recognition is the only factor in SAQ whose correlation with safety climate is not significant. Based on the aforementioned studies, stress recognition was removed from the analysis.

### The hypothesized model

Sexton *et al.* [22] and Lee *et al.* [29] both show that staff perceptions of management affect safety climate, teamwork climate, working conditions, and job satisfaction. Further, Salas *et al.* [43] propose the ‘big 5’ components that affect teamwork and put management leadership as the first component. They suggest that leaders will influence the effectiveness of teamwork by performance monitoring and backup behaviors. This is meaningful in the context of health-care since medical staffs will expect the leader to monitor how members commit to safety as well as expect the leaders to back it up with their own behaviors. Leonard *et al.* [44] investigated the importance of teamwork and communication of the members for safe patient care and pointed out that management leadership is a critical in changing safety culture through improving teamwork and

**Table 1** Demographic information of the respondents in the data set

| Category                                | Frequency | Percentage |
|-----------------------------------------|-----------|------------|
| <b>Gender</b>                           |           |            |
| Male                                    | 378       | 16.6       |
| Female                                  | 1899      | 83.4       |
| <b>Age</b>                              |           |            |
| <30 years old                           | 839       | 36.8       |
| 31–40 years old                         | 617       | 27.1       |
| 41–50 years old                         | 533       | 23.4       |
| 51–60 years old                         | 262       | 11.5       |
| 61 years old and above                  | 26        | 1.1        |
| <b>Types of job</b>                     |           |            |
| Physicians                              | 244       | 10.7       |
| Nurses                                  | 1352      | 59.4       |
| Medical technicians                     | 205       | 9.0        |
| Pharmacy staff                          | 63        | 2.8        |
| Administrative staff                    | 304       | 13.4       |
| Rehabilitation staff                    | 12        | 0.5        |
| Others                                  | 97        | 4.3        |
| <b>Working experience in hospital</b>   |           |            |
| Under 6 months                          | 110       | 4.8        |
| 6–11 months                             | 84        | 3.7        |
| 1–2 years                               | 383       | 16.8       |
| 3–4 years                               | 314       | 13.8       |
| 5–10 years                              | 456       | 20.0       |
| 11–20 years                             | 496       | 21.8       |
| Above 21 years                          | 434       | 19.1       |
| <b>Working experience in department</b> |           |            |
| Under 6 months                          | 170       | 7.5        |
| 6–11 months                             | 120       | 5.3        |
| 1–2 years                               | 460       | 20.2       |
| 3–4 years                               | 395       | 17.3       |
| 5–10 years                              | 507       | 22.3       |
| 11–20 years                             | 376       | 16.5       |
| Above 21 years                          | 249       | 10.9       |
| <b>Education</b>                        |           |            |
| Under junior                            | 17        | 0.7        |
| High school                             | 67        | 2.9        |
| College                                 | 1826      | 80.2       |
| Master’s degree or above                | 367       | 16.1       |

communication. For job satisfaction, there are prior studies that claim the leadership style of management directly affects the job satisfaction of employees [45–49]. Regarding working conditions, there has been research on transformational leadership that suggests leaders can develop a collective mindset within the group and affect the perceptions of member’s working conditions by the exertion of transformational leadership behaviors [50–52]. Drawing upon the aforementioned studies, we assume that perception of management leadership affects teamwork climate, job satisfaction’ and working conditions and we posit the following hypothesized model in Fig. 1.

Our main research objective is the mechanism of *how* staff perceptions of management leadership influences the safety climate of the organization—what we try to test in Fig. 1 is: (i) Perception of management leadership affects safety climate directly; or (ii) the effects of perceptions of management leadership on safety climate go through other dimensions; or (iii) both 1 and 2 hold true at the same time. We employ mediation analysis in this study to investigate these possibilities. Mediation analysis is the procedure to see if there are variables acting as intermediary vessels, which are called ‘mediators’ or ‘mediating variables’, when we analyze the relationship between an independent variable and a dependent variable [53]. With respect to the three cases mentioned above, the first case is ‘no mediation’, the second is ‘full mediation’ and the last is ‘partial mediation’. To perform mediation analysis, we formulate the research model using structural equation modeling (SEM) on AMOS ver. 21.0. SEM provides a state-of-the-art approach for analyzing mediated relationships among variables, particularly when multiple measures are required to capture the focal variables [54].

### Results

The validity and reliability of the model is checked by confirmatory factor analysis since SAQ has been already validated and widely used in the healthcare industry [23, 24]. The results are illustrated in Table 2. First, the questions with low factor loadings were dropped from the analysis. The scale reliabilities of all dimensions (which is indicated by Cronbach’s alpha) exceeded the recommended cutoff of 0.70 for established scales [55], and all questions in the model loaded significantly on their corresponding dimensions ( $P < 0.001$ ). The model fit statistics indicate the measurement model exhibited a reasonable fit [56] [ $\chi^2(160, N = 1596) = 1507.88; P = 0.000$ ; goodness-of-fit index = 0.909; adjusted goodness-of fit index = 0.880; Tucker–Lewis index (TLI) = 0.935; comparative fit index (CFI) = 0.945; root mean square error of approximation (RMSEA) = 0.073; standardized root mean square residual (SRMR) = 0.037]. The composite reliability (CR) values of the dimensions, which were all above 0.8, and average variance extracted (AVE) values, which were all above 0.5, indicate the good construct validity of the measurement model [56].

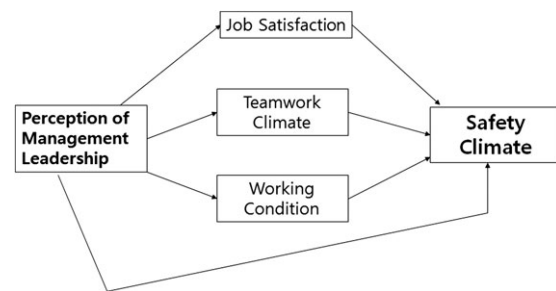

**Figure 1** Hypothesized model in this study.

**Table 2** Results of confirmatory factor analysis

| Dimension                           | Cronbach's Alpha | CR    | AVE   | Question | Factor loading | P-value |
|-------------------------------------|------------------|-------|-------|----------|----------------|---------|
| Perception of management leadership | 0.793            | 0.820 | 0.606 | pm23     | 0.788          |         |
|                                     |                  |       |       | pm24     | 0.848          | <0.001  |
|                                     |                  |       |       | pm25     | 0.657          | <0.001  |
| Teamwork climate                    | 0.837            | 0.844 | 0.575 | tc3      | 0.728          |         |
|                                     |                  |       |       | tc4      | 0.790          | <0.001  |
|                                     |                  |       |       | tc5      | 0.755          | <0.001  |
|                                     |                  |       |       | tc6      | 0.751          | <0.001  |
|                                     |                  |       |       | js14     | 0.746          |         |
| Job satisfaction                    | 0.936            | 0.939 | 0.755 | js15     | 0.863          | <0.001  |
|                                     |                  |       |       | js16     | 0.930          | <0.001  |
|                                     |                  |       |       | js17     | 0.931          | <0.001  |
|                                     |                  |       |       | js18     | 0.856          | <0.001  |
|                                     |                  |       |       | wc27     | 0.764          |         |
| Working conditions                  | 0.861            | 0.876 | 0.639 | wc28     | 0.779          | <0.001  |
|                                     |                  |       |       | wc29     | 0.746          | <0.001  |
|                                     |                  |       |       | wc30     | 0.852          | <0.001  |
|                                     |                  |       |       | sc7      | 0.781          |         |
| Safety climate                      | 0.857            | 0.870 | 0.625 | sc8      | 0.759          | <0.001  |
|                                     |                  |       |       | sc9      | 0.789          | <0.001  |
|                                     |                  |       |       | sc10     | 0.778          | <0.001  |

CR, Composite Reliability; AVE, Average Extracted Variance.

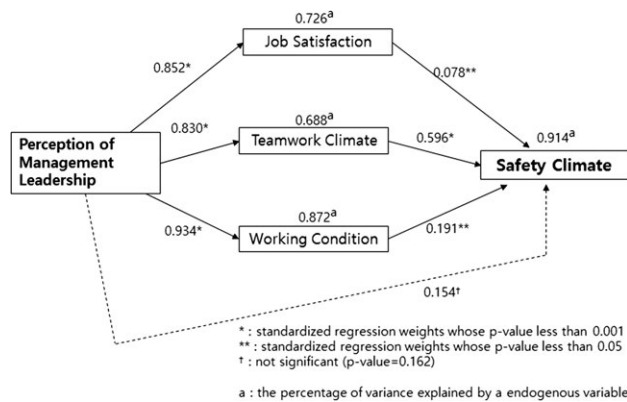

**Figure 2** Resulting model from the analysis.

Normality check of the sample, that is required in an SEM analysis which typically uses maximum likelihood (ML) estimation, shows that all the observed variables have absolute values of skewness <2 and absolute values of kurtosis <7, which means the sample data show sufficient univariate normality for ML estimation [57].

The summarized results of the research model in Fig. 1 are presented in Fig. 2. The structural model in Fig. 2 shows a reasonable fit [56] [ $\chi^2 (161, N = 1596) = 1396.368; P = 0.000; TLI = 0.941; CFI = 0.950; RMSEA = 0.069; SRMR = 0.037$ ]. The percentages of variance explained by endogenous variables for all dimensions (which is the same as R-squared in regression analysis) are high (safety climate = 0.914; job satisfaction = 0.726; working conditions = 0.872; teamwork climate = 0.688), indicating all the dimensions in the analysis are well explained by the model. In particular, our dependent variable, safety climate, has a very high value for the percentage of variance explained (0.914), which means that the safety climate of the participants is explained very well by the dimensions selected in this study. Moreover, all the standardized regression weights are statistically significant, except for the one

**Table 3** Decomposition of standardized effects

| Dimension                 | Perception of management | Teamwork climate | Job satisfaction | Working conditions |
|---------------------------|--------------------------|------------------|------------------|--------------------|
| <b>Safety climate</b>     |                          |                  |                  |                    |
| Direct                    | n.s.                     | 0.596*           | 0.078**          | 0.191**            |
| Indirect                  | 0.739*                   | –                | –                | –                  |
| Total                     | 0.739*                   | 0.596*           | 0.078**          | 0.191**            |
| <b>Teamwork climate</b>   |                          |                  |                  |                    |
| Direct                    | 0.830*                   | –                | –                | –                  |
| Total                     | 0.830*                   | –                | –                | –                  |
| <b>Job satisfaction</b>   |                          |                  |                  |                    |
| Direct                    | 0.852*                   | –                | –                | –                  |
| Total                     | 0.852*                   | –                | –                | –                  |
| <b>Working conditions</b> |                          |                  |                  |                    |
| Direct                    | 0.934*                   | –                | –                | –                  |
| Total                     | 0.934*                   | –                | –                | –                  |

\*  $P < 0.01$ .

\*\*  $P < 0.05$ .

n.s., not significant ( $P = 0.154$ ).

from perception of management leadership to safety climate (standardized regression weight of 0.154 with  $P = 0.162$ ).

Table 3 decomposes the standardized effects of the four safety culture dimensions tested in our model. All the effects are statistically significant, except for the direct effect of perception of management leadership on safety climate. The statistical significance of the standardized indirect effect of perception of management leadership on safety climate is produced by the bias-corrected percentile bootstrapping method (sample size of 1000, bootstrap 95% confidence interval lower limit of 0.496 and upper limit of 0.956, and  $P$ -value of 0.002).

In terms of total effects, perception of management leadership shows the largest effect on safety climate. Teamwork climate has the highest direct effect on safety climate (standardized effect of 0.596,

**Table 4** Fit statistics for partial and full mediation models

| Model             | $\chi^2$ | df  | P-value | CFI   | TLI   | RMSEA | SRMR  |
|-------------------|----------|-----|---------|-------|-------|-------|-------|
| Partial mediation | 1396.368 | 161 | 0.000   | 0.950 | 0.941 | 0.069 | 0.037 |
| Full mediation    | 1398.506 | 162 | 0.000   | 0.950 | 0.941 | 0.069 | 0.037 |

$P < 0.001$ ). Table 3 also shows that there is a large, significant indirect effect of the perception of management leadership on safety climate (standardized indirect effect of 0.739,  $P = 0.002$ ), which indicates that strong mediation effects exist between the perception of management leadership and safety climate. If we break down the indirect effects of perception of management leadership on safety climate, 66.9% ( $0.830 \times 0.596$ ) is mediated through teamwork climate, 24.1% ( $0.934 \times 0.191$ ) through working conditions and 9.0% ( $0.852 \times 0.078$ ) through job satisfaction.

To confirm the way management leadership affects safety climate, we compare two alternative structural models of partial mediation and full mediation using the approach in Holmbeck [58]. The structural model in Fig. 2 is the partial mediation model, since perception of management leadership not only affects safety climate directly, but indirectly through other dimensions. In the full mediation model, there is no direct path from perception of management leadership to safety climate. We thus need to check if adding a path from perception of management leadership to safety climate (partial mediation model) improves the fit of the full mediation model statistically by employing the chi-square difference test proposed by Bentler and Bonett [59], and we also have to examine if the added path in the partial mediation model is statistically significant. Table 4 compares the fits of these two models.

It can be found that the difference between the partial and full mediation models is not statistically significant [ $\chi^2 (1, N = 1596) = 2.138, P = 0.144$ ], and the other fit index values are almost identical. In addition, the added path in the partial mediation model is not statistically significant (Fig. 2). It has thus been shown that teamwork climate, working conditions and job satisfaction ‘fully mediate’ the effect of perception of management leadership on safety climate.

## Discussion

In this study, we investigate the impact of management leadership on safety climate based on the theoretical background of HRT and show that the influence of management leadership on safety climate is critical and fully mediated by other safety dimensions, which means the effect is ‘underlying’ and not easy to see but important for the improvement of PSC.

Based on the analysis at the focal hospital, several managerial implications can be suggested. First, management should be aware that it may be less effective if it tries to improve PSC by carrying out some plans to directly improve staff perceptions of their leadership. Instead, it should focus on investing resources to improve other mediator dimensions—the key is to show their sincere attitude of commitment on leading safety improvement when it carries out daily supportive actions concerning those safety dimensions. Griffin and Neal [60] and Hofmann *et al.* [61] suggest that managers should demonstrate their commitment through their behaviors and the firm management practices, so that workers can readily perceive it. Therefore, it would be helpful if management itself works to educate the staff so that it understands the importance of showing its commitment to safety with their ‘backup behaviors’ when implementing such efforts [43]. Also, management efforts may begin from teamwork climate improvement since

the majority of the effect perception of management leadership has on safety climate is mediated through teamwork climate (67% in our experimentation). Lee *et al.* [29] also claim managers should pay more attention to teamwork climate in order to improve PSC.

For further improvement, we may recommend developing a management system that can facilitate two-way trust between management and staff over the long term. For example, management may build a cloud-based quality center to enable full and timely information access, as well as the sharing of reports from both management and staff, as this can provide a more trusting culture in which staff can trust management when reporting safety issues and management can trust the information they get from the staff and thus use it to make further improvements [13].

This study has several limitations to be addressed by further research. First, even though the sample size was not small, all respondents were from one city in Taiwan, which can limit the generalizability of our results. Future research should leverage various sources of regions for a more general assessment. Second, it would be interesting to further evaluate other staffs (e.g. technicians, pharmacists and others) opinions regarding PSC by using an instrument that can be applied to all staffers. A more insightful conclusion could then be drawn using multigroup comparisons. In addition, since our research was performed as a cross-sectional study, in the future a longitudinal design may give a deeper understanding of the causality among the dimensions considered in the present work. Another limitation is the fact that this study was based on SAQ, and therefore was limited to four dimensions—and thus the outcomes may be interpreted only within the context of SAQ. Safety climate of an organization is not a simple construct, and further research might be done based on either other validated safety dimensions or newly constructed surveys. Lastly, future research may consider more hospitals so that reliability of experiment results can be better. However, there is an intense competition between hospitals in Taiwan and there may be a need to conquer data collection issues at multiple sites.

## References

- Chen IC, Li HH. Measuring patient safety culture in Taiwan using the Hospital Survey on Patient Safety Culture (HSOPSC). *BMC Health Serv Res* 2010;10:1.
- Sano M, Munechika M, Jin H *et al.* Analysis of medication incident for improvement of medication process. *Total Qual Manag Bus* 2013;24:859–68.
- Joint Commission. *National Patient Safety Goals* [Internet]. 2015. <http://www.jointcommission.org/PatientSafety/NationalPatientSafetyGoals/> (5 January 2016, date last accessed).
- Jia PL, Zhang LH, Zhang MM *et al.* Safety culture in a pharmacy setting using a pharmacy survey on patient safety culture: a cross-sectional study in China. *BMJ Open* 2014;4:e004904.
- McElroy LM, Woods DM, Yanes AF *et al.* Applying the WHO conceptual framework for the International Classification for Patient Safety to a surgical population. *Int J Qual Health Care* 2016;28:166–74.
- Harrison R, Cohen AWS, Walton M. Patient safety and quality of care in developing countries in Southeast Asia: a systematic literature review. *Int J Qual Health Care* 2015;27:240–54.
- Braithwaite J, Wears RL, Hollnagel E. Resilient health care: turning patient safety on its head. *Int J Qual Health Care* 2015. <http://dx.doi.org/10.1093/intqhc/mzv063>.



8. Rosen MA, Chima AM, Sampson JB *et al.* Engaging staff to improve quality and safety in an austere medical environment: a case-control study in two Sierra Leonean hospitals. *Int J Qual Health Care* 2015; mzv030.
9. Bloom BS. Crossing the quality chasm: a new health system for the 21st century. *JAMA* 2002;287:646–7.
10. Ruchlin HS, Dubbs NL, Callahan MA. The role of leadership in instilling a culture of safety: lessons from the literature. *J Healthc Manag* 2004;49:47.
11. La Porte TR. High reliability organizations: unlikely, demanding, and at risk. *J Conting Crisis Manag* 1996;4:60–71.
12. International Atomic Energy Agency. Safety Culture (Safety Series No. 75-INSAG-4) International Atomic Energy Agency, Vienna, 1991.
13. Firth-Cozens J. Organisational trust: the keystone to patient safety. *Qual Saf Health Care* 2004;13:56–61.
14. Luria G. The social aspects of safety management: trust and safety climate. *Accid Anal Prev* 2010;42:1288–95.
15. Dedobbeleer N, Beland F Is risk perception one of the dimensions of safety climate? In: Feyer A, Williamson A. *Occupational Injury: Risk, Prevention and Intervention*. London: Taylor and Francis, 1998, pp. 73–81.
16. Fleming MT, Flin R, Gordon R. The offshore supervisor's role in safety management: law enforcer or risk manager. In: *III International Conference on Health, Safety and Environment in Oil and Gas Exploration and Production*, New Orleans, LA, 1996.
17. Hale AR, Heming BHJ, Carthey J *et al.* Modelling of safety management systems. *Saf Sci* 1997;26:121–40.
18. O'Dea A, Flin R. Site managers and safety leadership in the offshore oil and gas industry. *Saf Sci* 2001;37:39–57.
19. Yule SF, Flin R, Murdy AJ. Modelling managerial influence on safety climate. In: *Poster presented at Society for Industrial and Organizational Psychology (SIOP) Conference*, San Diego, CA, 2001.
20. Zohar D. A group-level model of safety climate: testing the effect of group climate on micro-accidents in manufacturing jobs. *J Appl Psychol* 2000; 85:587–96.
21. Katz-Navon TAL, Naveh E, Stern ZI. Safety climate in health care organizations: A multidimensional approach. *Acad Manag J* 2005;48:1075–89.
22. Sexton JB, Helmreich RL, Neilands TB *et al.* The safety attitudes questionnaire: Psychometric properties, benchmarking data, and emerging research. *BMC Health Serv Res* 2006;6:44.
23. Fujita S, Seto K, Ito S *et al.* The characteristics of patient safety culture in Japan, Taiwan and the United States. *BMC Health Serv Res* 2013;13:20.
24. Wagner C, Smits M, Sorra J *et al.* Assessing patient safety culture in hospitals across countries. *Int J Qual Health Care* 2013;25:213–21.
25. Zohar D. A group-level model of safety climate: Testing the effect of group climate on microaccidents in manufacturing jobs. *J Appl Psychol* 2000;85:587–96.
26. Singla AK, Kitch BT, Weissman JS *et al.* Assessing patient safety culture: a review and synthesis of the measurement tools. *J Patient Saf* 2006;2:105–15.
27. Sammer CE, Lykens K, Singh KP *et al.* What is patient safety culture? A review of the literature. *J Nurs Scholarsh* 2010;42:156–65.
28. Hoff T, Jameson L, Hannan E *et al.* A review of the literature examining linkages between organizational factors, medical errors, and patient safety. *Med Care Res Rev* 2004;61:3–37.
29. Lee YC, Weng SJ, Stanworth JO *et al.* Identifying critical dimensions and causal relationships of patient safety culture in Taiwan. *J Med Imaging Health Inform* 2015;5:995–1000.
30. Lee YC, Huang CH, Weng SJ *et al.* Identifying critical factors of patient safety culture – a case of a regional hospital in Taiwan. *Int J Innov Manag Tech* 2014;5:183–188.
31. Lee LJ, Hsu CH, Hong JC. Explore the impact of hospital restructuring medical practitioners of patient safety culture attitudes. *J Health Manag* 2012;10:189–99.
32. Colla JB, Bracken AC, Kinney LM *et al.* Measuring patient safety climate: a review of surveys. *Qual Saf Health Care* 2005;14:364–6.
33. Helmreich RL, Foushee HC. *Why Crew Resource Management? Empirical and Theoretical Bases of Human Factors Training in Aviation*. San Diego, California: Academic Press, 1993.
34. Sexton JB, Thomas EJ, Helmreich RL. Error, stress, and teamwork in medicine and aviation: cross sectional surveys. *BMJ* 2000;320:745–9.
35. Vincent C, Taylor-Adams S, Stanhope N. Framework for analysing risk and safety in clinical medicine. *BMJ* 1998;316:1154–7.
36. Donabedian A. The quality of care: how can it be assessed? *JAMA* 1988; 260:1743–8.
37. Guldenmund FW. The nature of safety culture: a review of theory and research. *Saf Sci* 2000;34:215–57.
38. Kristensen S, Hammer A, Bartels P *et al.* Quality management and perceptions of teamwork and safety climate in European hospitals. *Int J Qual Health Care* 2015;27:499–506.
39. Zaheer S, Ginsburg L, Chuang YT. Patient safety climate (PSC) perceptions of frontline staff in acute care hospitals: examining the role of ease of reporting, unit norms of openness, and participative leadership. *Health Care Manage Rev* 2015;40:13–23.
40. Taylor JA, Pandian R. A dissonant scale: stress recognition in the SAQ. *BMC Res Notes* 2013;6:1.
41. Speroff T, Nwosu S, Greevy R *et al.* Organisational culture: variation across hospitals and connection to patient safety climate. *Qual Saf Health Care* 2010;19:592–6.
42. Taylor JA, Dominici F, Agnew J *et al.* Do nurse and patient injuries share common antecedents? An analysis of associations with safety climate and working conditions. *BMJ Qual Saf* 2012;21:101–11.
43. Salas E, Sims DE, Burke CS. Is there a 'Big Five' in teamwork? *Small Group Res* 2005;36:555–99.
44. Leonard M, Graham S, Bonacum D. The human factor: the critical importance of effective teamwork and communication in providing safe care. *Qual Saf Health Care* 2004;13:i85–90.
45. Lashbrook WB. Business performance, employee satisfaction, and leadership practices. *Perform Improv* 1997;36:29–33.
46. Bogler R. Two profiles of schoolteachers: A discriminant analysis of job satisfaction. *Teach Teach Educ* 2002;18:665–73.
47. Heller W. Neuropsychological mechanisms of individual differences in emotion, personality, and arousal. *Neuropsychology* 1993;7:476.
48. Mckee JG. Leadership styles of community college presidents and faculty job satisfaction. *Comm Jr Coll Quart Res Pract* 1991;15:33–46.
49. Judge TA, Piccolo RF. Transformational and transactional leadership: a meta-analytic test of their relative validity. *J Appl Psychol* 2004;89:755.
50. Feinberg BJ, Ostroff C, Burke WW. The role of within-group agreement in understanding transformational leadership. *J Occup Organ Psychol* 2005;78:471–88.
51. Pillai R, Williams EA. Transformational leadership, self-efficacy, group cohesiveness, commitment, and performance. *J Organ Change Manag* 2004;17:144–59.
52. Rentsch JR. Climate and culture: interaction and qualitative differences in organizational meanings. *J Appl Psychol* 1990;75:668.
53. Boone B. Mediation Analysis: Expanding From One Mediator to Multiple Mediators. Thesis. Carnegie Mellon University, 2012.
54. Brown RL. Assessing specific mediational effects in complex theoretical models. *Struct Equ Modeling* 1997;4:142–56.
55. Carmines EG, Zeller RA. *Reliability and Validity Assessment*. Beverly Hills, CA: Sage Publications, 1979.
56. Hair JF, Anderson RE, Tatham R *et al.* *Multivariate Data Analysis*, 5th edn. Upper Saddle River, New Jersey: Prentice-Hall International, 1998.
57. West SG, Finch JF, Curran PJ. *Structural Equation Models with Non-normal Variables. Structural Equation Modeling: Concepts, Issues, and Applications*. Thousand Oaks, CA: Sage Publications, 1995.
58. Holmbeck GN. Toward terminological, conceptual, and statistical clarity in the study of mediators and moderators: examples from the child-clinical and pediatric psychology literatures. *J Consult Clin Psychol* 1997; 65:599.
59. Bentler PM, Bonett DG. Significance tests and goodness of fit in the analysis of covariance structures. *Psychol Bull* 1980;88:588.
60. Griffin MA, Neal A. Perceptions of safety at work: a framework for linking safety climate to safety performance, knowledge, and motivation. *J Occup Health Psychol* 2000;5:347–58.
61. Hofmann DA, Jacobs R, Landy F. High reliability process industries: individual micro, and macroorganizational influences on safety performance. *J Safety Res* 1995;26:131–49.
